# Supplementary material for: A novel risk classification score for malignant ureteral obstruction: a multicenter prospective validation study
Source: PubMed Central journal article supplement (PMC7904864; doi:10.1038/s41598-021-84054-7), 2021-02-24
Supplement: 41598_2021_84054_MOESM1_ESM.pdf [file 41598_2021_84054_MOESM1_ESM.pdf]

**A novel risk classification score for malignant ureteral obstruction: a multicenter  
prospective validation study**

Kouji Izumi <sup>a,\*</sup>, Takashi Shima <sup>b</sup>, Kazuyoshi Shigehara <sup>a,c</sup>, Kiyoshi Sawada <sup>d</sup>, Renato Naito <sup>a,e</sup>,  
Yuki Kato <sup>a,f</sup>, Mitsuo Ofude <sup>c,g</sup>, Hiroshi Kano <sup>a,h</sup>, Hiroaki Iwamoto <sup>a</sup>, Hiroshi Yaegashi <sup>a,c</sup>,  
Kazufumi Nakashima <sup>a</sup>, Masashi Iijima <sup>a</sup>, Shohei Kawaguchi <sup>a,b</sup>, Takahiro Nohara <sup>a,b</sup>,  
Yoshifumi Kadono <sup>a</sup>, Atsushi Mizokami <sup>a</sup>

<sup>a</sup>Department of Integrative Cancer Therapy and Urology, Kanazawa University Graduate  
School of Medical Science, Kanazawa, Japan

<sup>b</sup>Department of Urology, Toyama Prefectural Central Hospital, Toyama, Japan

<sup>c</sup>Department of Urology, Ishikawa Prefectural Central Hospital, Kanazawa, Japan

<sup>d</sup>Department of Urology, Municipal Tsuruga Hospital, Tsuruga, Japan

<sup>e</sup>Department of Urology, Komatsu Municipal Hospital, Komatsu, Japan

<sup>f</sup>Department of Urology, Fukui-ken Saiseikai Hospital, Fukui, Japan

<sup>g</sup>Department of Urology, Kouseiren Takaoka Hospital, Takaoka, Japan

<sup>h</sup>Department of Urology, National Hospital Organization Kanazawa Medical Center,  
Kanazawa, Japan

| Supplementary Table 1. Patient demographics of ureteral stent-indwelled patients |                  |                  |                  |                |
|----------------------------------------------------------------------------------|------------------|------------------|------------------|----------------|
|                                                                                  | PLaCT risk group |                  |                  |                |
| Variable                                                                         | Good             | Intermediate     | Poor             | <i>p</i> value |
| Patients, <i>n</i> (%)                                                           | 83 (38)          | 72 (33)          | 62 (29)          |                |
| Median age (range), y                                                            | 64 (28–83)       | 66 (25–87)       | 72 (31–95)       | 0.0005         |
| Sex, <i>n</i> (%)                                                                |                  |                  |                  |                |
| Male                                                                             | 15 (18)          | 43 (60)          | 24 (39)          | 0.0035         |
| Female                                                                           | 68 (82)          | 29 (40)          | 38 (61)          |                |
| ECOG PS, <i>n</i> (%)                                                            |                  |                  |                  |                |
| 0                                                                                | 52 (63)          | 27 (38)          | 13 (21)          | < 0.0001       |
| 1                                                                                | 24 (29)          | 26 (36)          | 24 (39)          |                |
| 2                                                                                | 1 (1)            | 11 (15)          | 8 (13)           |                |
| 3                                                                                | 0 (0)            | 3 (4)            | 11 (18)          |                |
| 4                                                                                | 2 (2)            | 1 (1)            | 3 (5)            |                |
| Unknown                                                                          | 4 (5)            | 4 (6)            | 3 (5)            |                |
| Laterality, <i>n</i> (%)                                                         |                  |                  |                  |                |
| Unilateral                                                                       | 92 (88)          | 56 (53)          | 13 (15)          | < 0.0001       |
| Bilateral                                                                        | 13 (12)          | 50 (47)          | 76 (85)          |                |
| Median sCr (range), mg/mL                                                        | 0.83 (0.32–5.66) | 1.46 (0.42–32.4) | 2.59 (0.96–12.9) | < 0.0001       |
| Treatment for primary cancer, <i>n</i> (%)                                       |                  |                  |                  |                |
| Yes                                                                              | 82 (99)          | 59 (82)          | 19 (31)          | < 0.0001       |
| No                                                                               | 1 (1)            | 13 (18)          | 43 (69)          |                |
| Worst stenotic portion, <i>n</i> (%)                                             |                  |                  |                  |                |
| Upper, Upper-Middle, and Upper-Lower                                             | 17 (20)          | 21 (29)          | 21 (34)          | 0.0259         |
| Middle and Middle-Lower                                                          | 21 (25)          | 27 (38)          | 22 (35)          |                |
| Lower                                                                            | 38 (46)          | 19 (26)          | 15 (24)          |                |
| Unknown                                                                          | 7 (8)            | 5 (7)            | 4 (6)            |                |
| Median stenotic length (range), cm                                               | 2.4 (1.1–12)     | 3.0 (0.4–15)     | 3.9 (0.5–20)     | 0.0032         |
| Median WBC count (range), ×10 <sup>3</sup> /μL                                   | 5.6 (0.5–20.2)   | 6.2 (1.5–20.3)   | 6.0 (2.4–24.8)   | 0.2275         |
| Median Hb (range), g/dL                                                          | 11.0 (6.6–16.0)  | 10.2 (6.0–14.5)  | 9.8 (5.7–13.9)   | 0.0007         |
| Median Plt count (range), ×10 <sup>4</sup> /μL                                   | 22.9 (2.2–60.7)  | 22.1 (2.1–62.0)  | 22.0 (2.2–67.3)  | 0.8344         |
| Median CRP (range) <sup>a</sup> , mg/dL                                          | 1.3 (0.0–26.8)   | 1.6 (0.0–16.5)   | 2.9 (0.0–39.1)   | 0.1003         |
| Median BUN (range) <sup>a</sup> , mg/dL                                          | 14.5 (5.2–71.4)  | 23.0 (5.8–192)   | 35.4 (14.5–144)  | < 0.0001       |
| Median eGFR (range) <sup>a</sup> , mL/min                                        | 56.0 (6.0–146)   | 36.5 (1.0–124)   | 18.0 (2.5–54.0)  | < 0.0001       |
| Median TP (range) <sup>a</sup> , g/dL                                            | 6.6 (4.4–8.2)    | 6.3 (3.0–8.2)    | 6.2 (4.3–8.1)    | 0.0176         |

|                                                                                                                                                                                                                                                                                                                                                                                                                                                              |               |               |               |        |
|--------------------------------------------------------------------------------------------------------------------------------------------------------------------------------------------------------------------------------------------------------------------------------------------------------------------------------------------------------------------------------------------------------------------------------------------------------------|---------------|---------------|---------------|--------|
| Median Alb (range) <sup>a</sup> , g/dL                                                                                                                                                                                                                                                                                                                                                                                                                       | 3.6 (1.4–5.0) | 3.3 (1.4–4.7) | 3.2 (1.0–4.4) | 0.0025 |
| <p>Abbreviations: ECOG PS, Eastern Cooperative Oncology Group Performance Status; MUO, malignant ureteral obstruction; sCr, serum creatinine; WBC, white blood cell; Hb, hemoglobin; Plt, platelet; CRP, c-reactive protein; BUN, blood urea nitrogen; eGFR, estimated glomerular filtration rate; TP, total protein; Alb, albumin. <sup>a</sup>The numbers of missing data points are 14, 2, 2, 7, and 42 in CRP, BUN, eGFR, TP, and Alb, respectively.</p> |               |               |               |        |

| Supplementary Table 2. Primary cancer sites of ureteral stent-indwelled patients |                              |                  |              |         |                      |
|----------------------------------------------------------------------------------|------------------------------|------------------|--------------|---------|----------------------|
| Primary cancer site                                                              | Overall current study cohort | PLaCT risk group |              |         | p value <sup>a</sup> |
|                                                                                  |                              | Good             | Intermediate | Poor    |                      |
| Patients, n (%)                                                                  | 217 (100)                    | 83 (38)          | 72 (33)      | 62 (29) |                      |
| Gynecological                                                                    | 52 (24)                      | 36 (43)          | 10 (14)      | 6 (10)  | < 0.0001             |
| Ovary                                                                            | 27 (12)                      | 19 (23)          | 6 (8)        | 2 (3)   |                      |
| Cervix                                                                           | 16 (7)                       | 12 (14)          | 3 (4)        | 1 (2)   |                      |
| Uterine                                                                          | 9 (4)                        | 5 (6)            | 1 (1)        | 3 (5)   |                      |
| Gastrointestinal                                                                 | 52 (24)                      | 10 (12)          | 17 (24)      | 25 (40) | < 0.0001             |
| Stomach                                                                          | 49 (23)                      | 10 (12)          | 16 (22)      | 23 (37) |                      |
| Esophagus                                                                        | 2 (1)                        | 0 (0)            | 1 (1)        | 1 (2)   |                      |
| GIST                                                                             | 1 (0)                        | 0 (0)            | 0 (0)        | 1 (2)   |                      |
| Lower digestive tract                                                            | 46 (21)                      | 20 (24)          | 17 (24)      | 9 (15)  | 0.1803               |
| Colon                                                                            | 27 (12)                      | 8 (10)           | 12 (17)      | 7 (11)  |                      |
| Rectum                                                                           | 17 (8)                       | 11 (13)          | 4 (6)        | 2 (3)   |                      |
| Cecum                                                                            | 2 (1)                        | 1 (1)            | 1 (1)        | 0 (0)   |                      |
| Genitourinary                                                                    | 16 (7)                       | 4 (5)            | 9 (13)       | 3 (5)   | 0.8607               |
| Bladder                                                                          | 4 (2)                        | 1 (1)            | 2 (3)        | 1 (2)   |                      |
| Ureter                                                                           | 4 (2)                        | 0 (0)            | 4 (6)        | 0 (0)   |                      |
| Prostate                                                                         | 2 (1)                        | 0 (0)            | 1 (1)        | 1 (2)   |                      |
| Retroperitoneal sarcoma                                                          | 3 (1)                        | 1 (1)            | 2 (3)        | 0 (0)   |                      |
| Adrenal gland                                                                    | 0 (0)                        | 0 (0)            | 0 (0)        | 0 (0)   |                      |
| Germ cell                                                                        | 2 (1)                        | 1 (1)            | 0 (0)        | 1 (2)   |                      |
| Urachus                                                                          | 1 (0)                        | 1 (1)            | 0 (0)        | 0 (0)   |                      |
| Other                                                                            | 51 (24)                      | 13 (16)          | 19 (26)      | 19 (31) | 0.031                |
| Malignant lymphoma                                                               | 22 (10)                      | 6 (7)            | 9 (13)       | 7 (11)  |                      |
| Pancreas                                                                         | 10 (5)                       | 4 (5)            | 3 (4)        | 3 (5)   |                      |
| Breast                                                                           | 7 (3)                        | 1 (1)            | 3 (4)        | 3 (5)   |                      |
| Lung                                                                             | 5 (2)                        | 0 (0)            | 2 (3)        | 3 (5)   |                      |
| Liver                                                                            | 0 (0)                        | 0 (0)            | 0 (0)        | 0 (0)   |                      |
| Gallbladder                                                                      | 3 (1)                        | 2 (2)            | 0 (0)        | 1 (2)   |                      |
| Sarcoma                                                                          | 0 (0)                        | 0 (0)            | 0 (0)        | 0 (0)   |                      |
| Unknown origin                                                                   | 4 (2)                        | 0 (0)            | 2 (3)        | 2 (3)   |                      |

Abbreviation: GIST, gastrointestinal stromal tumor. <sup>a</sup>Comparison among risk groups using chi-squared test for trend.
